# Supplementary material for: Ramen restaurant prevalence is associated with stroke mortality in Japan: an ecological study
Source: PubMed Central journal article supplement (PMC6727387; doi:10.1186/s12937-019-0482-y), 2019-09-04

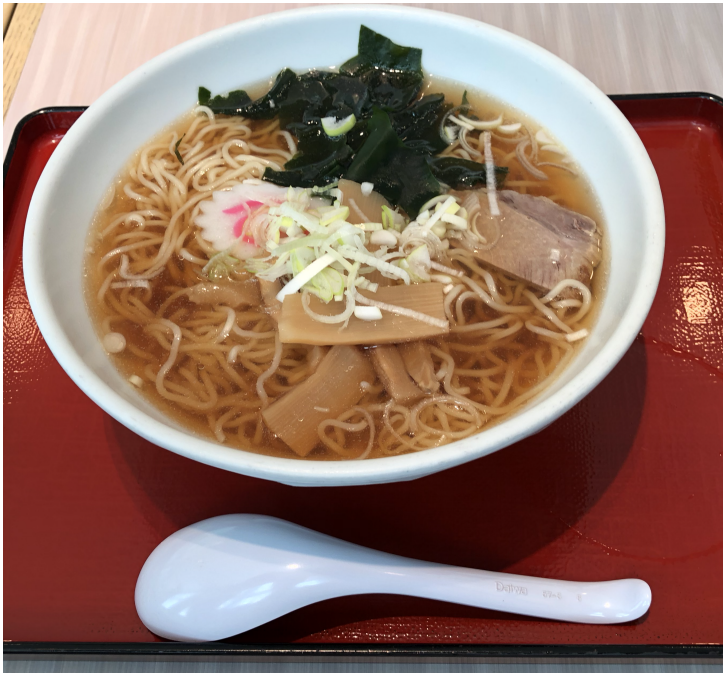

Supplement: 12937_2019_482_MOESM1_ESM.pdf [file 12937_2019_482_MOESM1_ESM.pdf]
